# Supplementary material for: Allium-Based Phytobiotic Enhances Egg Production in Laying Hens through Microbial Composition Changes in Ileum and Cecum
Source: PubMed Central journal article supplement (PMC7915398; doi:10.3390/ani11020448), 2021-02-09

Table S1. Nutritional information of the basal feed employed in laying hens.

|               | %     |
|---------------|-------|
| Raw protein   | 16.00 |
| Carbohydrates | 57.57 |
| Raw fiber     | 3.90  |
| Fat content   | 3.50  |
| Ashes         | 13.00 |
| Calcium       | 3.85  |
| Phosphorus    | 0.59  |
| Sodium        | 0.16  |
| Lysine        | 0.97  |
| Metionine     | 0.46  |

Supplementary Figures 1. Bar plot of the relative bacterial abundance at the genus level in different gut regions of laying hens and treatments. Control refers to laying hens fed a basal diet while Garlicon refers to experimental laying hens fed a basal diet supplemented with the commercial *Alliaceae* extract. The sixteen most abundance genera are shown in a unique color set. The color of the rest of genera (less abundant) are repeated every 8 colors.

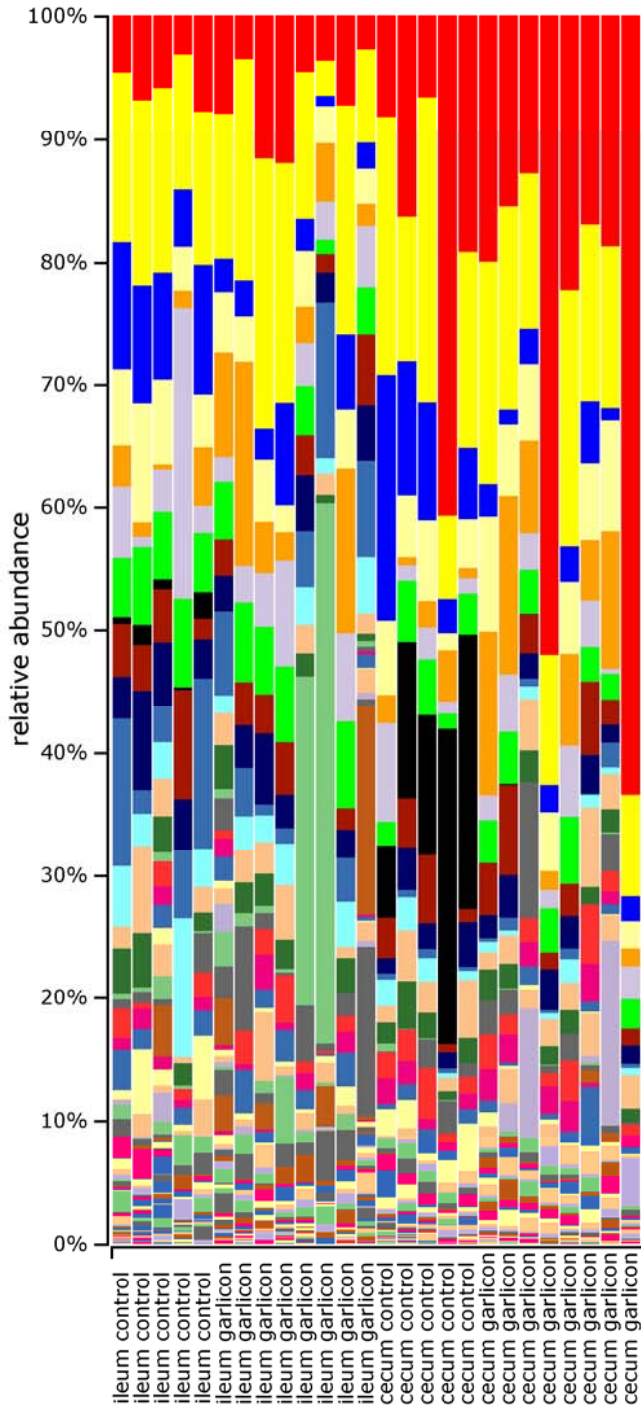

- p\_Proteobacteria;c\_Deltaproteobacteria;o\_Desulfovibrionales;f\_Desulfovibrionaceae;g\_Desulfovibrio
- p\_Firmicutes;c\_Clostridia;o\_Clostridiales;f\_Veillonellaceae;g\_Phascalarctobacterium
- p\_Bacteroidetes;c\_Bacteroidia;o\_Bacteroidales;f\_Bacteroidaceae;g\_Bacteroides
- p\_Bacteroidetes;c\_Bacteroidia;o\_Bacteroidales;f\_g
- p\_Fusobacteria;c\_Fusobacteria;o\_Fusobacteriales;f\_Fusobacteriaceae;g\_Fusobacterium
- p\_Firmicutes;c\_Clostridia;o\_Clostridiales;f\_Veillonellaceae;g\_Megamonas
- p\_Firmicutes;c\_Clostridia;o\_Clostridiales;f\_Ruminococcaceae;g
- p\_OPB;c\_o\_f;g
- p\_Tenericutes;c\_Mollicutes;o\_RF39;f\_g
- p\_Firmicutes;c\_Clostridia;o\_Clostridiales;f\_Mogibacteriaceae;g
- p\_Firmicutes;c\_Clostridia;o\_Clostridiales;f\_Peptostreptococcaceae;g
- p\_Actinobacteria;c\_Coriorbacteriales;o\_Coriorbacteriales;f\_Coriorbacteriaceae;g
- p\_Spirochaetes;c\_Spirochaetes;o\_Sphaerochaetales;f\_Sphaerochaetaceae;g\_Sphaerochaeta
- p\_Firmicutes;c\_Erysipelotrichi;o\_Erysipelotrichales;f\_Erysipelotrichaceae;g
- p\_Firmicutes;c\_Bacilli;o\_Lactobacillales;f\_Streptococcaceae;g\_Streptococcus
- p\_Bacteroidetes;c\_Bacteroidia;o\_Bacteroidales;f\_Paraprevotellaceae;g\_Prevotella
- p\_Firmicutes;c\_Clostridia;o\_Clostridiales;f\_Lachnospiraceae;g\_Coprococcus
- p\_Bacteroidetes;c\_Bacteroidia;o\_Bacteroidales;f\_Odoribacteraceae;g\_Odoribacter
- p\_Firmicutes;c\_Erysipelotrichi;o\_Erysipelotrichales;f\_Erysipelotrichaceae;g\_Eubacterium
- p\_Bacteroidetes;c\_Bacteroidia;o\_Bacteroidales;f\_S24-7;g
- p\_Cyanobacteria;c\_400d-2;o\_YS2;f\_g
- p\_Spirochaetes;c\_Spirochaetes;o\_Spirochaetales;f\_Spirochaetaceae;g\_Treponema
- p\_Firmicutes;c\_Erysipelotrichi;o\_Erysipelotrichales;f\_Erysipelotrichaceae;g\_cc\_115
- p\_Firmicutes;c\_Erysipelotrichi;o\_Erysipelotrichales;f\_Erysipelotrichaceae;g\_Coprobacillus
- p\_Firmicutes;c\_Bacilli;o\_Lactobacillales;f\_Streptococcaceae;g\_Lactococcus
- p\_Firmicutes;c\_Erysipelotrichi;o\_Erysipelotrichales;f\_Erysipelotrichaceae;g\_RFN20
- p\_Firmicutes;c\_Clostridia;o\_Clostridiales;f\_Veillonellaceae;g\_Megasphaera
- p\_Bacteroidetes;c\_Bacteroidia;o\_Bacteroidales;f\_Paraprevotellaceae;g
- p\_Proteobacteria;c\_Alphaproteobacteria;o\_f;g
- p\_Firmicutes;c\_Erysipelotrichi;o\_Erysipelotrichales;f\_Erysipelotrichaceae;g\_p-75-a5
- p\_Bacteroidetes;c\_Bacteroidia;o\_Bacteroidales;f\_Paraprevotellaceae;g\_YRC22
- p\_Firmicutes;c\_Bacilli;o\_Lactobacillales;f\_Lactobacillaceae;g\_Lactobacillus
- p\_Tenericutes;c\_Mollicutes;o\_Anaeroplasmatales;f\_Anaeroplasmataceae;g
- p\_Bacteroidetes;c\_Bacteroidia;o\_Bacteroidales;f\_Paraprevotellaceae;g\_CF231
- p\_Bacteroidetes;c\_Bacteroidia;o\_Bacteroidales;f\_Prevotellaceae;g
- p\_Proteobacteria;c\_Alphaproteobacteria;o\_RF32;f\_g
- p\_Spirochaetes;c\_Spirochaetes;o\_f;g
- p\_Deferribacteres;c\_Deferribacteres;o\_Deferribacterales;f\_Deferribacteraceae;g\_Mucispirillum
- p\_Proteobacteria;c\_Alphaproteobacteria;o\_Sphingomonadales;f\_Erythrobacteraceae;g
- p\_Proteobacteria;c\_Epsilonproteobacteria;o\_Campylobacteriales;f\_Helicobacteraceae;g
- p\_Firmicutes;c\_Clostridia;o\_Clostridiales;f\_Lachnospiraceae;g
- p\_Bacteroidetes;c\_Bacteroidia;o\_Bacteroidales;f\_Odoribacteraceae;g\_Butyricimonas
- p\_Proteobacteria;c\_Alphaproteobacteria;o\_Sphingomonadales;f\_Sphingomonadaceae;g\_Sphingomonas
- p\_Firmicutes;c\_Clostridia;o\_Clostridiales;f\_Ruminococcaceae;g\_Anaerotruncus
- p\_Firmicutes;c\_Erysipelotrichi;o\_Erysipelotrichales;f\_Erysipelotrichaceae;g\_Bulleidia
- p\_Firmicutes;c\_Clostridia;o\_Clostridiales;f\_Lachnospiraceae;g\_Ruminococcus
- p\_Firmicutes;c\_Clostridia;o\_Clostridiales;f\_Veillonellaceae;g\_Veillonella
- p\_Firmicutes;c\_Clostridia;o\_Clostridiales;f\_Tissierellaceae;g\_Anaerococcus
- p\_Proteobacteria;c\_Alphaproteobacteria;o\_Sphingomonadales;f\_Sphingomonadaceae;g\_Kaistobacter
- p\_Tenericutes;c\_RF3;o\_ML615J-28;f\_g
- p\_Proteobacteria;c\_Alphaproteobacteria;o\_Sphingomonadales;f\_Sphingomonadaceae;g\_Sphingobium
- p\_Firmicutes;c\_Clostridia;o\_Clostridiales;f\_g
- p\_Verrucomicrobia;c\_Verrucomicrobia;o\_WCHB1-41;f\_RFP12;g
- p\_Bacteroidetes;c\_Bacteroidia;o\_Bacteroidales;f\_Porphyrionadaceae;g
- p\_Firmicutes;c\_Clostridia;o\_Clostridiales;f\_Clostridiaceae;g\_Candidatus Arthromitus
- p\_Firmicutes;c\_Bacilli;o\_Lactobacillales;f\_Carnobacteriaceae;g\_Granulicatella
- p\_Firmicutes;c\_Bacilli;o\_Bacillales;f\_Bacillaceae;g
- p\_Firmicutes;c\_Clostridia;o\_Clostridiales;f\_Ruminococcaceae;g\_Oscillospira
- p\_Firmicutes;c\_Clostridia;o\_Clostridiales;f\_Tissierellaceae;g\_Finegoldia
- p\_Firmicutes;c\_Erysipelotrichi;o\_Erysipelotrichales;f\_Erysipelotrichaceae;g
- p\_Proteobacteria;c\_Betaproteobacteria;o\_Burkholderiales;f\_Oxalobacteraceae;g
- p\_Proteobacteria;c\_Alphaproteobacteria;o\_Sphingomonadales;f\_g
- p\_Firmicutes;c\_Clostridia;o\_Clostridiales;f\_Mogibacteriaceae;g

- p\_Tenericutes;c\_Mollicutes;o\_Mycoplasmatales;f\_Mycoplasmataceae;g
- p\_Bacteroidetes;c\_Sphingobacteria;o\_Sphingobacteriales;f\_Sphingobacteriaceae;g\_Sphingobacterium
- p\_Firmicutes;c\_Clostridia;o\_Clostridiales;f\_Ruminococcaceae;g\_Anaerofillum
- p\_Bacteroidetes;c\_Saprosiriales;o\_Saprosiriales;f\_Chitinophagaceae;g\_Sediminibacterium
- p\_Proteobacteria;c\_Epsilonproteobacteria;o\_Campylobacteriales;f\_Campylobacteraceae;g\_Campylobacter
- p\_Thermi;c\_Deinococci;o\_Deinococcales;f\_Deinococcaceae;g\_Deinococcus
- p\_Proteobacteria;c\_Gammaproteobacteria;o\_Pseudomonadales;f\_Moraxellaceae;g\_Psychrobacter
- p\_Firmicutes;c\_Clostridia;o\_Clostridiales;f\_Clostridiaceae;g\_Clostridium
- p\_Proteobacteria;c\_Gammaproteobacteria;o\_Pseudomonadales;f\_Moraxellaceae;g\_Acinetobacter
- p\_Firmicutes;c\_Clostridia;o\_Clostridiales;f\_Lachnospiraceae;g\_Blautia
- p\_Proteobacteria;c\_Gammaproteobacteria;o\_Aeromonadales;f\_Succinivibrionaceae;g\_Anaerobiospirillum
- p\_Firmicutes;c\_Bacilli;o\_Lactobacillales;f\_Aerococcaceae;g
- p\_Bacteroidetes;c\_Bacteroidia;o\_Bacteroidales;f\_Prevotellaceae;g\_Prevotella
- p\_Actinobacteria;c\_Actinobacteria;o\_Actinomycetales;f\_Actinomycetaceae;g\_Actinomyces
- p\_Bacteroidetes;c\_Bacteroidia;o\_Bacteroidales;f\_Barnesiellaceae;g
- p\_Firmicutes;c\_Clostridia;o\_Clostridiales;f\_Tissierellaceae;g\_Gallicola
- p\_Acidobacteria;c\_Acidobacteria-6;o\_iii1-15;f\_g
- p\_Bacteroidetes;c\_Sphingobacteria;o\_Sphingobacteriales;f\_Sphingobacteriaceae;g\_Pedobacter
- p\_Spirochaetes;c\_Spirochaetes;o\_Spirochaetales;f\_Spirochaetaceae;g\_Spirochaeta
- p\_Proteobacteria;c\_Gammaproteobacteria;o\_Enterobacteriales;f\_Enterobacteriaceae;g
- p\_Firmicutes;c\_Clostridia;o\_Clostridiales;f\_Clostridiaceae;g
- p\_Firmicutes;c\_Clostridia;o\_Clostridiales;f\_Acidaminobacteraceae;g\_Fusibacter
- p\_Bacteroidetes;c\_Bacteroidia;o\_Bacteroidales;f\_Paraprevotellaceae;g
- p\_Firmicutes;c\_Clostridia;o\_Clostridiales;f\_Clostridiaceae;g
- p\_Proteobacteria;c\_Gammaproteobacteria;o\_Xanthomonadales;f\_Xanthomonadaceae;g\_Stenotrophomonas
- p\_Proteobacteria;c\_Betaproteobacteria;o\_Burkholderiales;f\_Alcaligenaceae;g\_Sutterella
- p\_Bacteroidetes;c\_Saprosiriales;o\_Saprosiriales;f\_Chitinophagaceae;g\_Segetibacter
- p\_Firmicutes;c\_Clostridia;o\_Clostridiales;f\_Tissierellaceae;g\_Peptoniphilus
- p\_Bacteroidetes;c\_Bacteroidia;o\_Bacteroidales;f\_BS11;g
- p\_Firmicutes;c\_Clostridia;o\_Clostridiales;f\_Ruminococcaceae;g\_Faecalibacterium
- p\_Tenericutes;c\_Mollicutes;o\_Mycoplasmatales;f\_Mycoplasmataceae;g\_Mycoplasma
- p\_Bacteroidetes;c\_Bacteroidia;o\_Bacteroidales;f\_Porphyrionadaceae;g\_Parabacteroides
- p\_Actinobacteria;c\_Coriorbacteriales;o\_Coriorbacteriales;f\_Coriorbacteriaceae;g
- p\_Firmicutes;c\_Clostridia;o\_Clostridiales;f\_Tissierellaceae;g\_ph2
- p\_Firmicutes;c\_Bacilli;o\_Lactobacillales;f\_Aerococcaceae;g\_Alloicoccus
- p\_Bacteroidetes;c\_Sphingobacteria;o\_Sphingobacteriales;f\_Sphingobacteriaceae;g
- p\_Proteobacteria;c\_Gammaproteobacteria;o\_Xanthomonadales;f\_Xanthomonadaceae;g
- p\_Proteobacteria;c\_Betaproteobacteria;o\_Burkholderiales;f\_Comamonadaceae;g\_Delftia
- p\_Firmicutes;c\_Bacilli;o\_Bacillales;f\_Staphylococcaceae;g\_Macrococcus
- p\_Firmicutes;c\_Bacilli;o\_Bacillales;f\_Staphylococcaceae;g\_Staphylococcus
- p\_Firmicutes;c\_Clostridia;o\_Clostridiales;f\_Ruminococcaceae;g\_Ruminococcus
- p\_Firmicutes;c\_Clostridia;o\_Clostridiales;f\_Christensenellaceae;g
- p\_Verrucomicrobia;c\_Verrucomicrobia;o\_Verrucomicrobiales;f\_Verrucomicrobiaceae;g\_Akkermansia
- p\_Bacteroidetes;c\_Flavobacteria;o\_Flavobacteriales;f\_Flavobacteriaceae;g\_Flavobacterium
- p\_Bacteroidetes;c\_Bacteroidia;o\_Bacteroidales;f\_Rikenellaceae;g
- p\_WPS-2;c\_o\_f;g
- p\_Firmicutes;c\_Clostridia;o\_Clostridiales;f\_Lachnospiraceae;g
- p\_Firmicutes;c\_Clostridia;o\_Clostridiales;f\_Ruminococcaceae;g
- p\_Bacteroidetes;c\_Bacteroidia;o\_Bacteroidales;f\_Porphyrionadaceae;g\_Paludibacter
- p\_Proteobacteria;c\_Gammaproteobacteria;o\_Pseudomonadales;f\_Moraxellaceae;g\_Enhydrobacter
- p\_Proteobacteria;c\_Betaproteobacteria;o\_SBl14;f\_g
- p\_Proteobacteria;c\_Betaproteobacteria;o\_Burkholderiales;f\_Oxalobacteraceae;g\_Janthinobacterium
- p\_Firmicutes;c\_Clostridia;o\_Clostridiales;f\_Lachnospiraceae;g\_Butyriivibrio
- p\_Firmicutes;c\_Bacilli;o\_Lactobacillales;f\_Carnobacteriaceae;g\_Trichococcus
- p\_Proteobacteria;c\_Gammaproteobacteria;o\_Aeromonadales;f\_Succinivibrionaceae;g
- p\_Proteobacteria;c\_Deltaproteobacteria;o\_Bdellovibrionales;f\_Bacteriovoracaceae;g
- p\_Elusimicrobia;c\_Elusimicrobia;o\_Elusimicrobiales;f\_Elusimicrobiaceae;g
- p\_Verrucomicrobia;c\_Opitutae;o\_Cerasicoccales;f\_Cerasicocaceae;g
- p\_Synergistetes;c\_Synergistia;o\_Synergistales;f\_Synergistaceae;g
- p\_Proteobacteria;c\_Gammaproteobacteria;o\_Pseudomonadales;f\_Pseudomonadaceae;g\_Pseudomonas
- p\_Proteobacteria;c\_Gammaproteobacteria;o\_Aeromonadales;f\_Succinivibrionaceae;g
- p\_Proteobacteria;c\_Deltaproteobacteria;o\_Desulfovibrionales;f\_Desulfovibrionaceae;g
- p\_Proteobacteria;c\_Alphaproteobacteria;o\_Caulobacteriales;f\_Caulobacteraceae;g
- p\_Actinobacteria;c\_Actinobacteria;o\_Actinomycetales;f\_Propionibacteriaceae;g\_Propionibacterium

Figure S2. Linear Discriminant Analysis Effect Size (Lefse) showing genera from the ileum that significantly differ between control and experimentally supplemented with a commercial Alliaceae (Garlicon40 ©) laying hens. Bars showed relative abundance of the genus in each sample. Solid line represents mean relative abundance while dashed line represent the median. k: kingdom; p: phylum; c: class; o: order; f: family; and g: genus.

k\_Bacteria\_p\_Bacteroidetes\_c\_Bacteroidia\_o\_Bacteroidales\_f\_Bacteroidaceae\_g\_Bacteroides

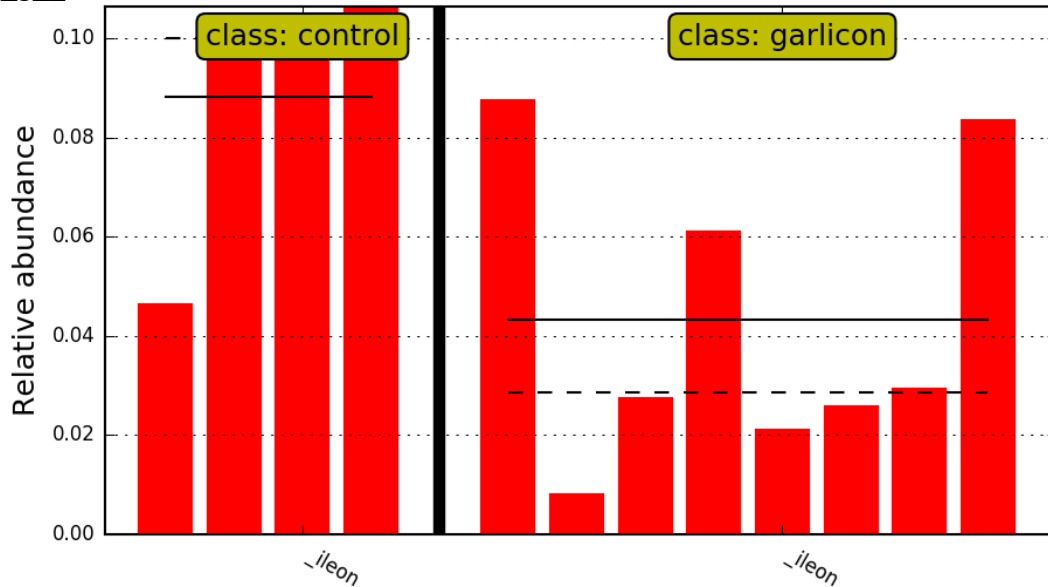

k\_Bacteria\_p\_Firmicutes\_c\_Bacilli\_o\_Lactobacillales\_f\_Streptococcaceae\_g\_Lactococcus

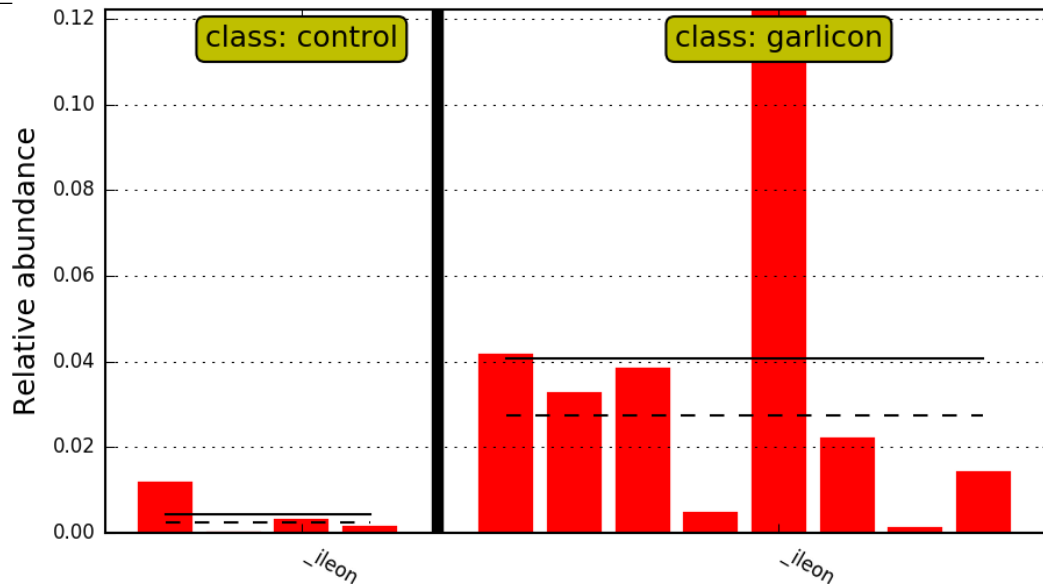

k\_Bacteria\_p\_Firmicutes\_c\_Erysipelotrichi\_o\_Erysipelotrichales\_f\_Erysipelotrichaceae\_g\_Bulleidia

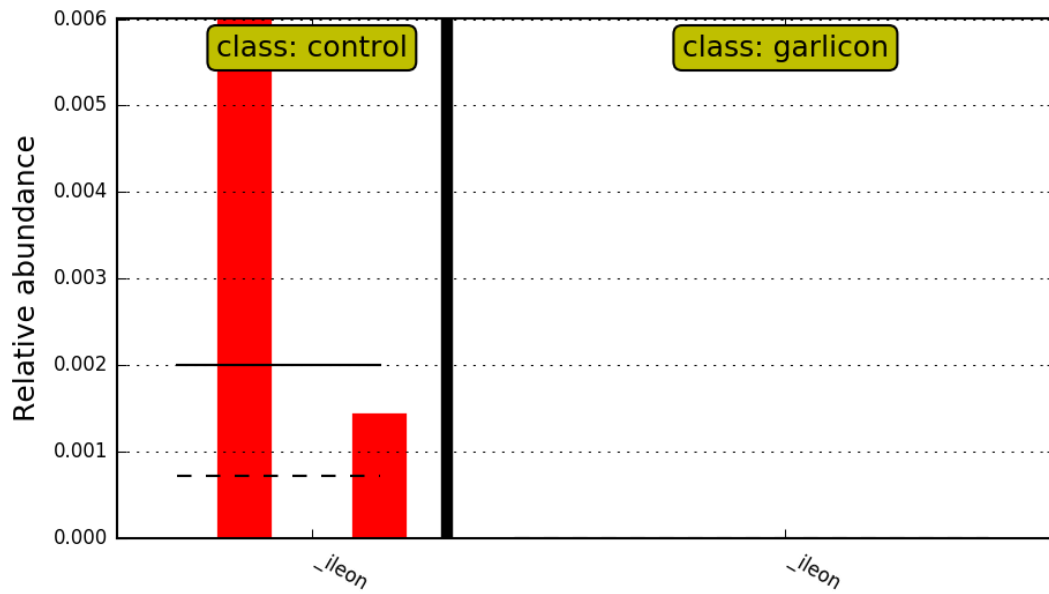

k\_Bacteria\_p\_OP8\_c\_o\_f\_g

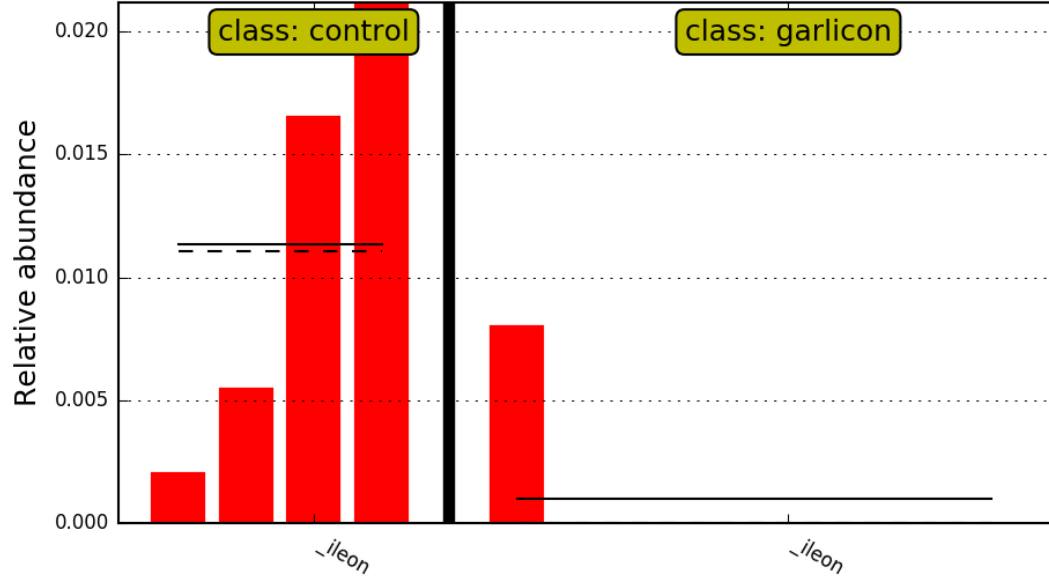

k\_Bacteria\_p\_Tenericutes\_c\_Mollicutes\_o\_Anaeroplasmatales\_f\_Anaeroplasmataceae\_g

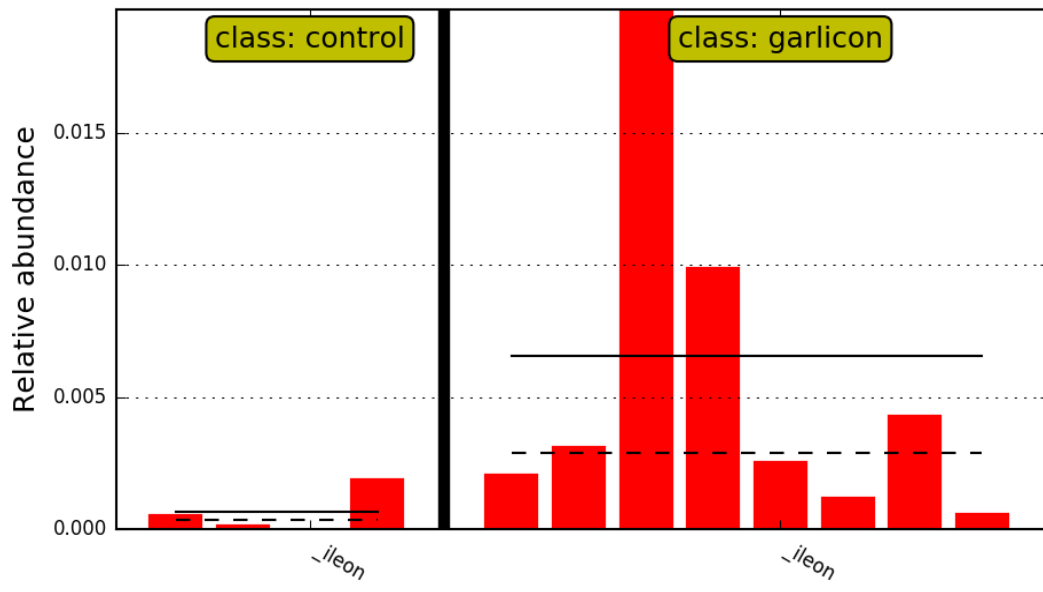

Figure S3. Linear Discriminant Analysis Effect Size (Lefse) showing genera from the cecum (*ciego*) that significantly differ between control and experimentally supplemented with a commercial Alliaceae (Garlicon40 ©) laying hens. Bars showed relative abundance of the genus in each sample. Solid line mean relative abundance while dashed line showed median relative abundance. k: kingdom; p: phylum; c: class; o: order; f: family; and g: genus.

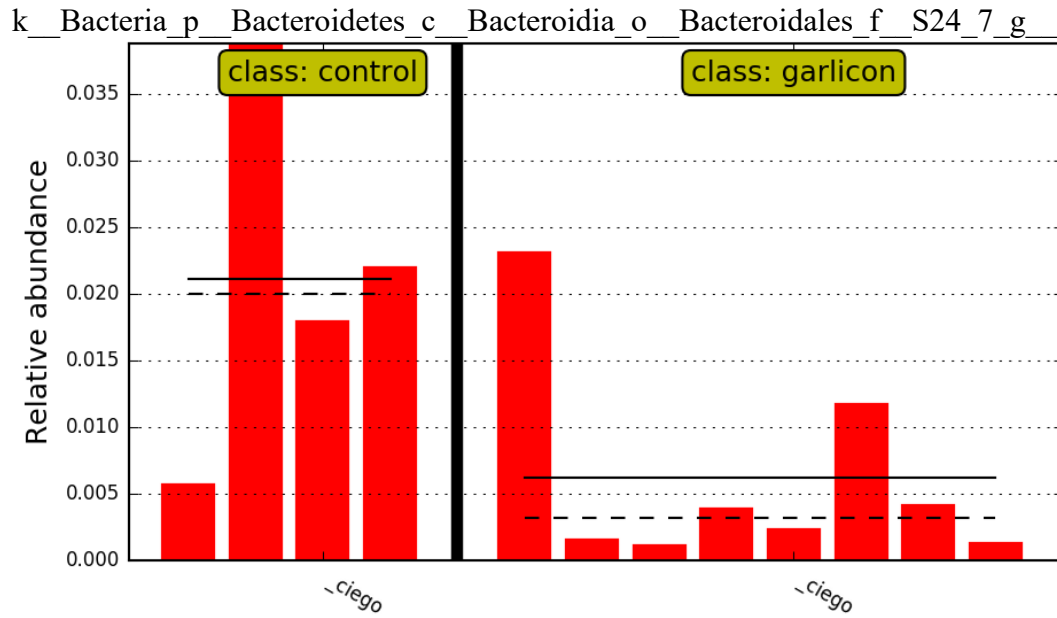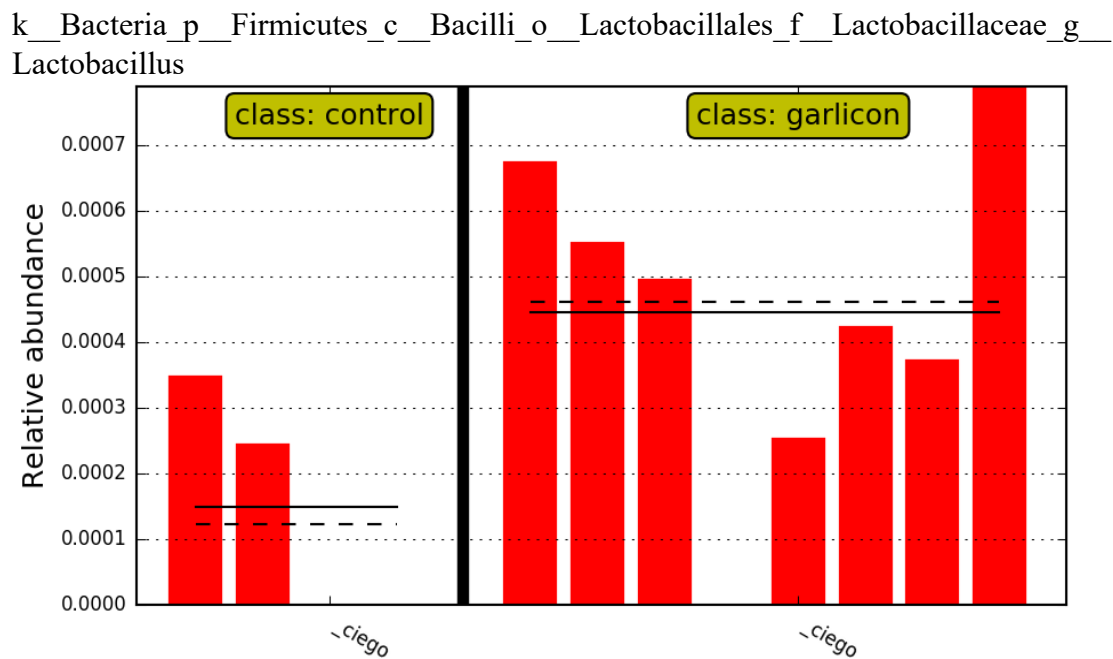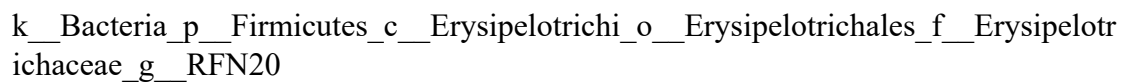





k\_Bacteria\_p\_Proteobacteria\_c\_Alphaproteobacteria\_o\_RF32\_f\_g

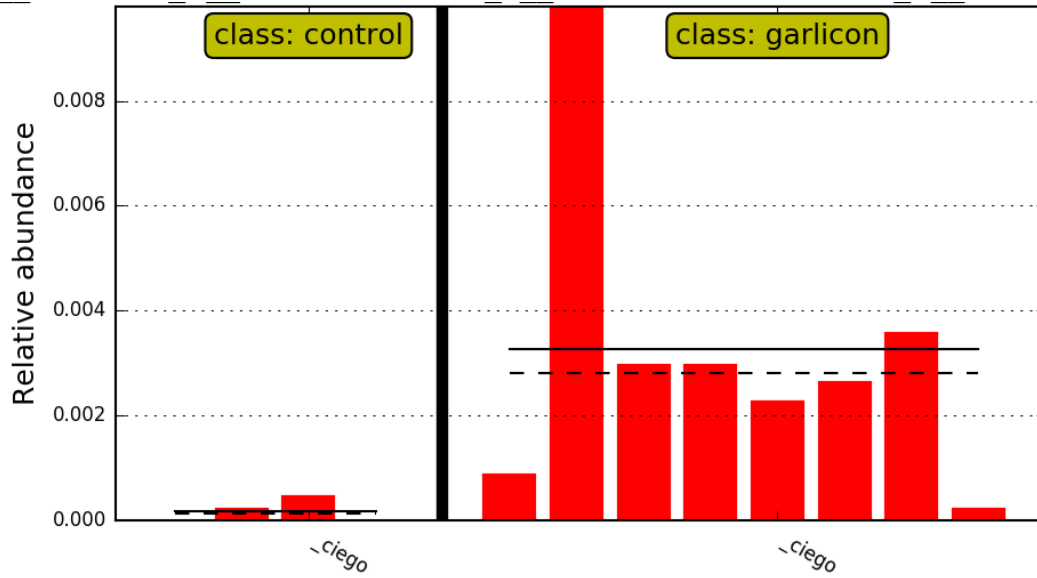

k\_Bacteria\_p\_Proteobacteria\_c\_Gammaproteobacteria\_o\_Aeromonadales\_f\_Succinivibrionaceae\_g\_Anaerobiospirillum

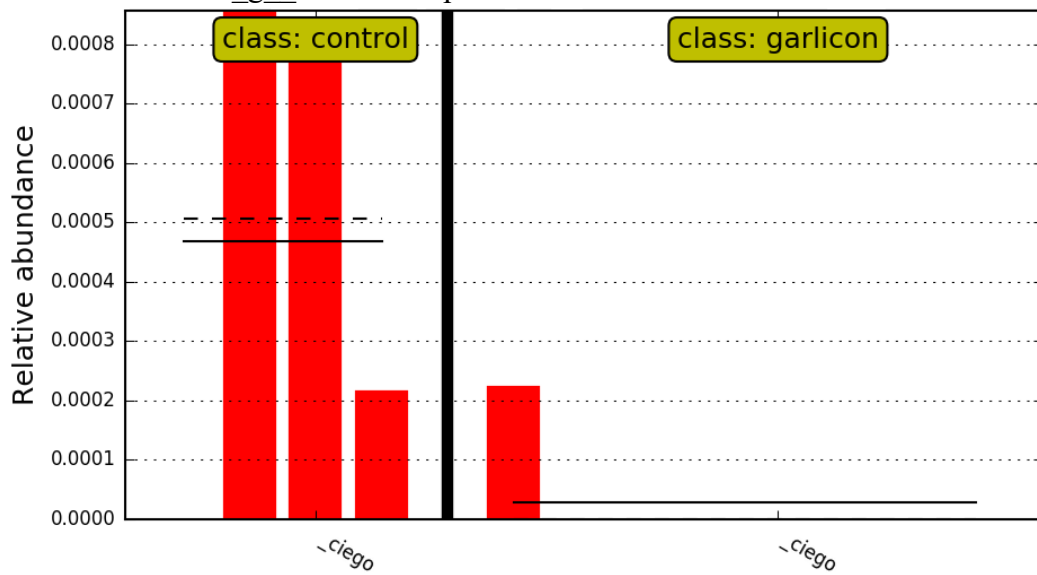

k\_Bacteria\_p\_Proteobacteria\_c\_Gammaproteobacteria\_o\_Pseudomonadales\_f\_Moraxellaceae\_g\_Acinetobacter

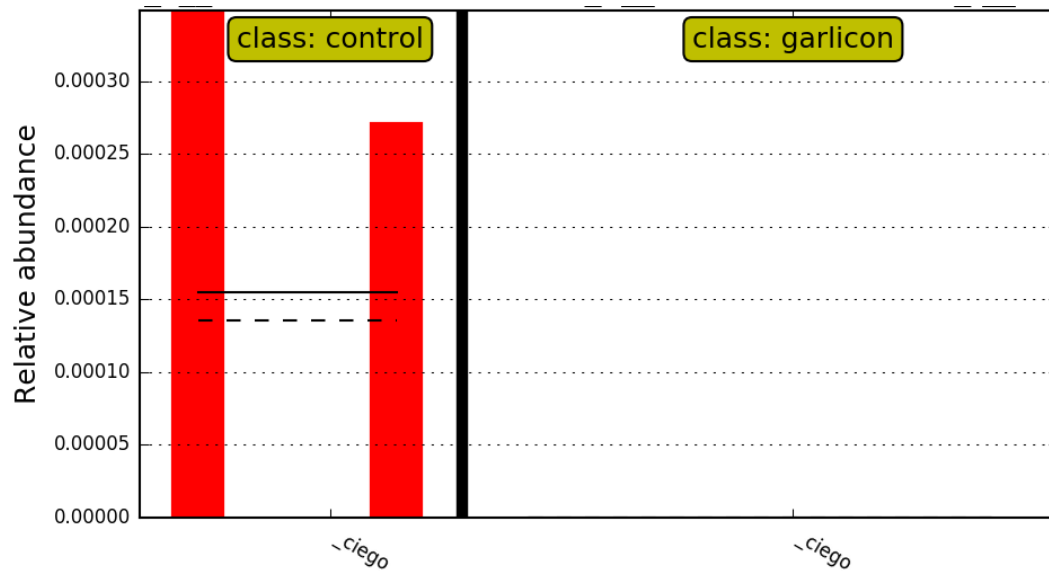

Supplement: animals-11-00448-s001.pdf [file animals-11-00448-s001.pdf]
